# Supplementary material
Source: MDPI journal article supplement (https://www.mdpi.com/2073-4441/11/12/2578)

## Supplementary Materials

### Supplementary tables:

**Table A1.** Information of tap water sampling sites supplied centrally by tap water company in Gannan and Longnan.

| Area    | Sampling site  | Latitude (°) | Longitude (°) | Elevation (m) |
|---------|----------------|--------------|---------------|---------------|
| Gannan  | Hezuo          | 34.988       | 102.905       | 2894          |
|         | Xiahe Xian     | 35.200       | 102.520       | 2908          |
|         | Lintan Xian    | 34.690       | 103.351       | 2790          |
|         | Jone Xian      | 34.588       | 103.498       | 2543          |
|         | Luqu Xian      | 34.594       | 102.481       | 3112          |
|         | Maqu Xian      | 33.990       | 102.079       | 3475          |
|         | Tewo Xian      | 34.058       | 103.225       | 2495          |
|         | Zhugqu Xian    | 33.784       | 104.362       | 1348          |
| Longnan | Wudu           | 33.396       | 104.932       | 1267          |
|         | Dangchang Xian | 34.039       | 104.389       | 1954          |
|         | Wen Xian       | 32.945       | 104.674       | 937           |
|         | Kang Xian      | 33.336       | 105.615       | 1313          |
|         | Cheng Xian     | 33.740       | 105.724       | 952           |
|         | Hui Xian       | 33.770       | 106.079       | 910           |
|         | Liangdang Xian | 33.919       | 106.298       | 982           |
|         | Xihe Xian      | 33.995       | 105.297       | 1573          |
|         | Li Xian        | 34.191       | 105.178       | 1427          |

## Supplementary figures:

**Figure A1.** Spatial variations of annual mean values of  $d$ -excess (‰) in tap water in Gannan and Longnan. The map of  $d$ -excess was calculated according to  $d$ -excess =  $\delta^2\text{H} - 8 \delta^{18}\text{O}$ , based on the maps of  $\delta^2\text{H}$  and  $\delta^{18}\text{O}$  in tap water.

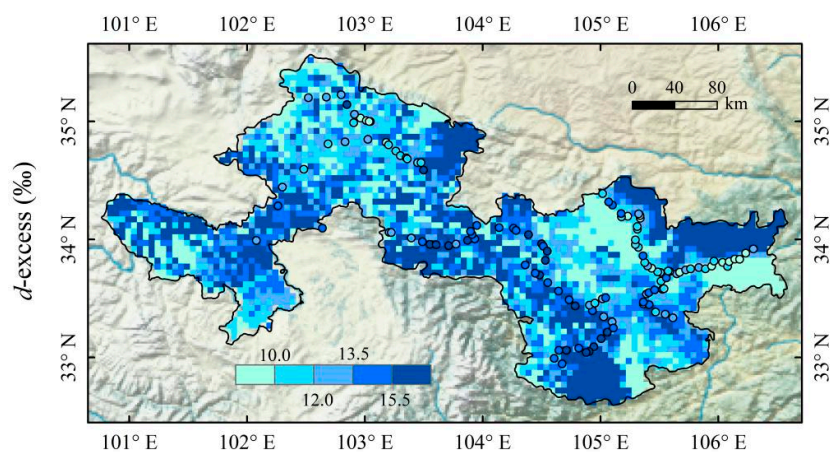

Supplement: s1 [file s1]
